# Supplementary material
Source: PubMed Central journal article supplement (PMC7943179)
Supplement: NIHMS1672779-supplement-Supplemental_Figure_1.pdf [file NIHMS1672779-supplement-Supplemental_Figure_1.pdf]

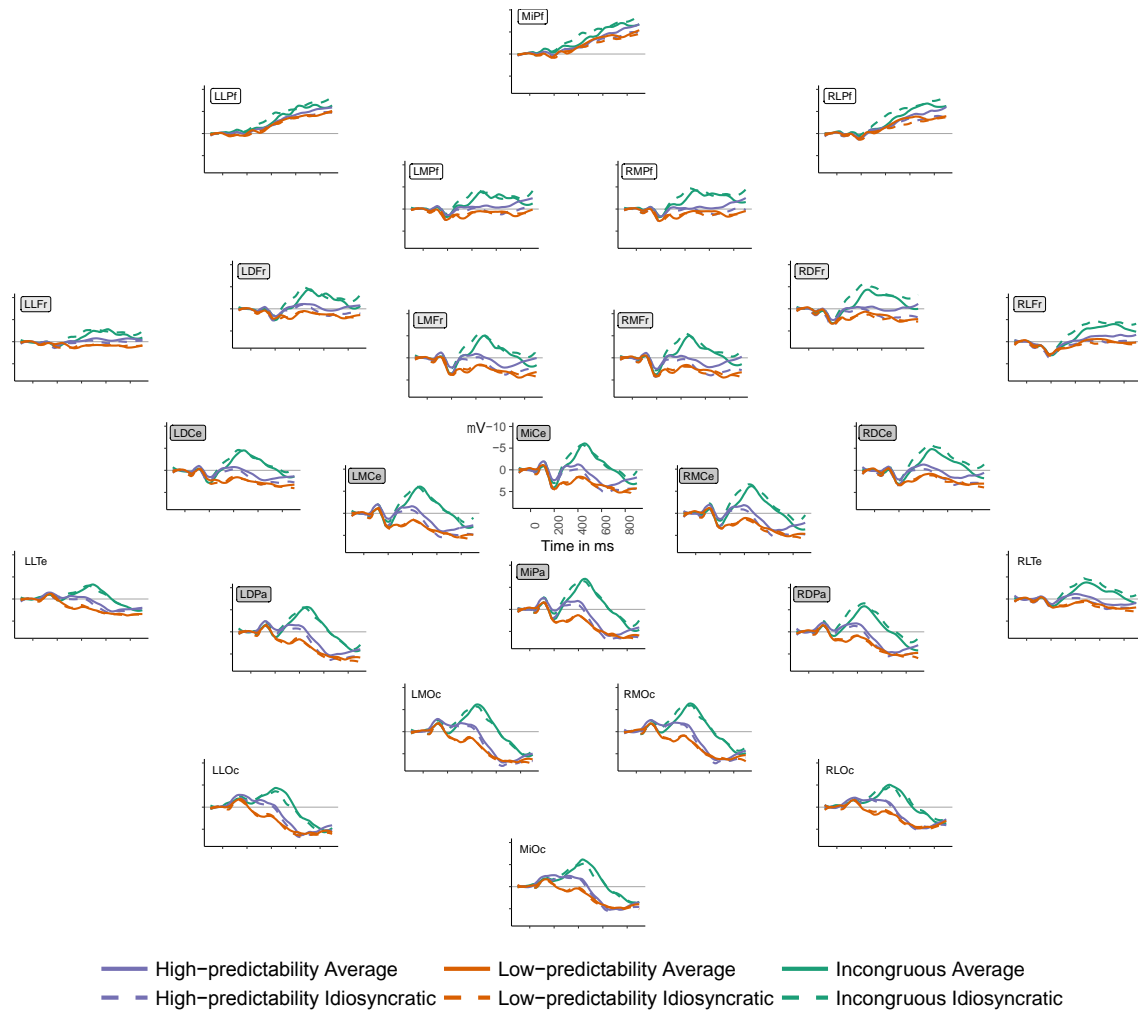

Supplemental Figure 1. Average ERP amplitude in Experiment 2 across predictability and talker conditions. Channels included in analyses (either in the N400 window or later frontal positivity window) are indicated by the presence of rectangles around their labels (N400 electrodes = gray fill, frontal electrodes = light gray and white fill, prefrontal electrodes = white fill).
