# Supplementary material
Source: PubMed Central journal article supplement (PMC7943179)
Supplement: NIHMS1672779-supplement-Supplemental_Material_S1.pdf [file NIHMS1672779-supplement-Supplemental_Material_S1.pdf]

### Supplemental Material S1

|                             | Visual Accuracy       |       |         | Auditory Accuracy       |       |         |
|-----------------------------|-----------------------|-------|---------|-------------------------|-------|---------|
| <i>Fixed Effects</i>        | b                     | SE    | z-value | b                       | SE    | z-value |
| (Intercept)                 | 6.77                  | 1.31  | 5.18    | 6.03                    | 0.81  | 7.41    |
| IN vs. LP & HP              | -1.87                 | 1.45  | -1.29   | 0.31                    | 0.85  | 0.36    |
| LP vs. HP                   | 2.00                  | 0.87  | 2.30    | 3.12                    | 1.05  | 2.98    |
| <i>Random Effects</i>       | Var.                  | SD    |         | Var.                    | SD    |         |
| Target (Intercept)          | 10.60                 | 3.26  |         | 7.05                    | 2.66  |         |
| Participant (Intercept)     | 0.34                  | 0.58  |         | 0.16                    | 0.40  |         |
| Participant: IN vs. LP & HP | 4.10                  | 2.02  |         | 2.64                    | 1.63  |         |
| Participant: LP vs. HP      | 0.25                  | 0.5   |         | 0.13                    | 0.36  |         |
|                             |                       |       |         |                         |       |         |
|                             | Visual Response Times |       |         | Auditory Response Times |       |         |
| <i>Fixed Effects</i>        | b                     | SE    | t-value | b                       | SE    | t-value |
| (Intercept)                 | 6.61                  | 0.06  | 119.37  | 6.92                    | 0.035 | 198.033 |
| LP vs. HP & IN              | -0.10                 | 0.027 | -3.73   | -0.15                   | 0.023 | -6.29   |
| HP vs. IN                   | -0.17                 | 0.022 | -7.80   | -0.15                   | 0.024 | -6.09   |
| <i>Random Effects</i>       | Var.                  | SD    |         | Var.                    | SD    |         |
| Target (Intercept)          | 0.0061                | 0.078 |         | 0.011                   | 0.11  |         |
| Participant (Intercept)     | 0.048                 | 0.22  |         | 0.018                   | 0.13  |         |
| Participant: LP vs. HP & IN | 0.0061                | 0.078 |         | 0.002                   | 0.049 |         |
| Participant: HP vs. IN      | 0.00041               | 0.020 |         | 0.0017                  | 0.042 |         |
| Residuals                   | 0.081                 | 0.28  |         | 0.053                   | 0.23  |         |

S1.1 Experiment 1: Mixed effects models of accuracy and response times in the Visual and Auditory modalities.

|                             | Visual N400 |      |         | Auditory N400         |       |         |                          |      |         |
|-----------------------------|-------------|------|---------|-----------------------|-------|---------|--------------------------|------|---------|
| <i>Fixed Effects</i>        | b           | SE   | t-value | b                     | SE    | t-value |                          |      |         |
| (Intercept)                 | 2.42        | 1.18 | 2.05    | -2.95                 | 0.84  | -3.53   |                          |      |         |
| IN vs. LP & HP              | 4.43        | 0.54 | 8.21    | 4.03                  | 0.55  | 7.38    |                          |      |         |
| LP vs. HP                   | 1.10        | 0.61 | 1.82    | 2.00                  | 0.66  | 3.04    |                          |      |         |
| <i>Random Effects</i>       | Var.        | SD   |         | Var.                  | SD    |         |                          |      |         |
| Participant (Intercept)     | 19.50       | 4.42 |         | 10.76                 | 3.28  |         |                          |      |         |
| Participant: LP & HP vs. IN | 3.98        | 2.00 |         | 4.17                  | 2.04  |         |                          |      |         |
| Participant: LP vs. HP      | 5.18        | 2.28 |         | 6.39                  | 2.53  |         |                          |      |         |
| Electrode (Intercept)       | 1.36        | 1.17 |         | 0.20                  | 0.44  |         |                          |      |         |
| Electrode: IN vs. LP & HP   | 0.13        | 0.36 |         | 0.18                  | 0.43  |         |                          |      |         |
| Electrode: LP vs. HP        | 0.07        | 0.27 |         | 0.12                  | 0.35  |         |                          |      |         |
| Residuals                   | 2.20        | 1.48 |         | 1.13                  | 1.06  |         |                          |      |         |
|                             |             |      |         |                       |       |         |                          |      |         |
|                             | Visual FP   |      |         | Auditory FP (frontal) |       |         | Auditory FP (prefrontal) |      |         |
| <i>Fixed Effects</i>        | b           | SE   | t-value | b                     | SE    | t-value | b                        | SE   | t-value |
| (Intercept)                 | -3.93       | 1.25 | -3.15   | -5.52                 | 1.247 | -4.43   | -7.68                    | 1.39 | -5.53   |
| LP vs. HP & IN              | -1.36       | 0.49 | -2.80   | -2.37                 | 0.64  | -3.71   | -2.32                    | 0.76 | -3.06   |

|                             |       |      |      |       |      |      |       |      |      |
|-----------------------------|-------|------|------|-------|------|------|-------|------|------|
| HP vs. IN                   | 0.73  | 0.84 | 0.87 | 2.69  | 0.74 | 3.64 | 1.95  | 0.96 | 2.03 |
| <i>Random Effects</i>       | Var.  | SD   |      | Var.  | SD   |      | Var.  | SD   |      |
| Participant (Intercept)     | 15.80 | 3.97 |      | 14.93 | 3.86 |      | 15.79 | 3.97 |      |
| Participant: LP vs. HP & IN | 2.07  | 1.44 |      | 5.27  | 2.30 |      | 6.44  | 2.54 |      |
| Participant: HP vs. IN      | 8.87  | 2.98 |      | 6.84  | 2.61 |      | 11.69 | 3.42 |      |
| Electrode (Intercept)       | 2.77  | 1.66 |      | 6.74  | 2.60 |      | 4.63  | 2.15 |      |
| Electrode: LP vs. HP & IN   | 0.14  | 0.37 |      | 0.41  | 0.64 |      | 0.50  | 0.71 |      |
| Electrode: HP vs. IN        | 0.23  | 0.47 |      | 0.76  | 0.87 |      | 0.50  | 0.70 |      |
| Residuals                   | 4.22  | 2.05 |      | 4.63  | 2.15 |      | 3.87  | 1.97 |      |

S1.2 Experiment 1: Mixed effects models of mean amplitude in N400 window and

Frontal Positivity window in the visual and auditory modalities.
