# Supplementary material
Source: PubMed Central journal article supplement (PMC7943179)
Supplement: NIHMS1672779-supplement-Supplemental_Material_S2.pdf [file NIHMS1672779-supplement-Supplemental_Material_S2.pdf]

## Supplemental Material S2

| Fixed Effects                                              | Response Time |      |         | Accuracy |      |         |
|------------------------------------------------------------|---------------|------|---------|----------|------|---------|
|                                                            | b             | SE   | t-value | b        | SE   | z-value |
| (Intercept)                                                | 6.92          | 0.04 | 188.62  | 9.40     | 0.81 | 11.58   |
| IN vs. HP and LP                                           | -0.13         | 0.03 | -5.23   | -1.14    | 1.12 | -1.02   |
| HP vs. LP                                                  | 0.05          | 0.02 | 2.79    | -1.23    | 0.71 | -1.73   |
| Average vs. Idiosyncratic                                  | 0.01          | 0.02 | 0.49    | 0.52     | 0.68 | 0.77    |
| IN vs. HP and LP x Average vs. Idiosyncratic               | 0.01          | 0.03 | 0.41    | -1.49    | 1.93 | -0.77   |
| HP vs. LP x Average vs. Idiosyncratic                      | -0.01         | 0.02 | -0.59   | 1.02     | 0.86 | 1.2     |
|                                                            |               |      |         |          |      |         |
| Random Effects                                             | Var.          | SD   |         | Var.     | SD   |         |
| Participants (Intercept)                                   | 0.03          | 0.18 |         | 0.92     | 0.96 |         |
| Participants: IN vs. HP and LP                             | 0.01          | 0.09 |         |          |      |         |
| Participants: HP vs. LP                                    | 0.00          | 0.04 |         |          |      |         |
| Participants: Average vs. Idiosyncratic                    | 0.01          | 0.08 |         |          |      |         |
| Participants: IN vs. HP and LP x Average vs. Idiosyncratic | 0.00          | 0.05 |         |          |      |         |
| Participants: HP vs. LP x Average vs. Idiosyncratic        | 0.00          | 0.04 |         |          |      |         |
| Items (Intercept)                                          | 0.02          | 0.13 |         | 39.55    | 6.29 |         |
| Items: Average x Idiosyncratic                             | 0.00          | 0.02 |         |          |      |         |
| Residual                                                   | 0.067         | 0.26 |         |          |      |         |

S2.1 Experiment 2: Mixed effects models of response time and accuracy.

| Fixed Effects                                              | N400  |      |         |  |  |  |
|------------------------------------------------------------|-------|------|---------|--|--|--|
|                                                            | b     | SE   | t-value |  |  |  |
| (Intercept)                                                | -0.36 | 0.42 | -0.85   |  |  |  |
| IN vs. HP and LP                                           | 5.55  | 0.53 | 10.57   |  |  |  |
| HP vs. LP                                                  | 1.96  | 0.55 | 3.54    |  |  |  |
| Average vs. Idiosyncratic                                  | -0.11 | 0.37 | -0.30   |  |  |  |
| IN vs. HP and LP x Average vs. Idiosyncratic               | -1.34 | 0.76 | -1.75   |  |  |  |
| HP vs. LP x Average vs. Idiosyncratic                      | 0.97  | 1.00 | 0.97    |  |  |  |
|                                                            |       |      |         |  |  |  |
| Random Effects                                             | Var.  | SD   |         |  |  |  |
| Participants (Intercept)                                   | 4.06  | 2.02 |         |  |  |  |
| Participants: IN vs. HP and LP                             | 5.07  | 2.25 |         |  |  |  |
| Participants: HP vs. LP                                    | 7.07  | 2.66 |         |  |  |  |
| Participants: Average vs. Idiosyncratic                    | 3.16  | 1.78 |         |  |  |  |
| Participants: IN vs. HP and LP x Average vs. Idiosyncratic | 12.62 | 3.55 |         |  |  |  |
| Participants: HP vs. LP x Average vs. Idiosyncratic        | 23.31 | 4.82 |         |  |  |  |
| Electrodes (Intercept)                                     | 0.08  | 0.28 |         |  |  |  |
| Electrodes: IN vs. HP and LP                               | 0.46  | 0.68 |         |  |  |  |

|                                                            |              |      |         |                 |      |         |
|------------------------------------------------------------|--------------|------|---------|-----------------|------|---------|
| Electrodes: HP vs. LP                                      | 0.03         | 0.17 |         |                 |      |         |
| Electrodes: Average vs. Idiosyncratic                      | 0.03         | 0.16 |         |                 |      |         |
| Electrodes: IN vs. HP and LP x Average vs. Idiosyncratic   | 0.26         | 0.51 |         |                 |      |         |
| Electrodes: HP vs. LP x Average vs. Idiosyncratic          | 0.01         | 0.12 |         |                 |      |         |
| Residual                                                   | 1.60         | 1.26 |         |                 |      |         |
|                                                            | FP (frontal) |      |         | FP (prefrontal) |      |         |
| Fixed Effects                                              | b            | SE   | t-value | b               | SE   | t-value |
| (Intercept)                                                | -1.28        | 0.89 | -1.44   | -3.27           | 1.17 | -2.79   |
| LP vs. HP and IN                                           | -2.33        | 0.56 | -4.15   | -2.06           | 0.59 | -3.47   |
| HP vs. IN                                                  | -2.38        | 0.60 | -3.98   | -2.16           | 0.68 | -3.18   |
| Average vs. Idiosyncratic                                  | -0.27        | 0.39 | -0.69   | -0.31           | 0.47 | -0.67   |
| LP vs. HP and IN x Average vs. Idiosyncratic               | -0.14        | 0.76 | -0.18   | -0.05           | 0.78 | -0.06   |
| HP vs. IN x Average vs. Idiosyncratic                      | 2.19         | 0.94 | 2.35    | 2.04            | 0.99 | 2.06    |
| Random Effects                                             | Var.         | SD   |         | Var.            | SD   |         |
| Participants (Intercept)                                   | 4.42         | 2.10 |         | 5.65            | 2.38 |         |
| Participants: LP vs. HP and IN                             | 6.85         | 2.62 |         | 6.97            | 2.64 |         |
| Participants: HP vs. IN                                    | 7.84         | 2.80 |         | 10.09           | 3.18 |         |
| Participants: Average vs. Idiosyncratic                    | 3.40         | 1.84 |         | 4.76            | 2.18 |         |
| Participants: LP vs. HP and IN x Average vs. Idiosyncratic | 12.71        | 3.56 |         | 12.20           | 3.49 |         |
| Participants: HP vs. IN x Average vs. Idiosyncratic        | 18.99        | 4.36 |         | 20.69           | 4.55 |         |
| Electrodes (Intercept)                                     | 6.65         | 2.58 |         | 5.68            | 2.38 |         |
| Electrodes: LP vs. HP and IN                               | 0.21         | 0.46 |         | 0.22            | 0.47 |         |
| Electrodes: HP vs. IN                                      | 0.17         | 0.41 |         | 0.07            | 0.27 |         |
| Electrodes: Average vs. Idiosyncratic                      | 0.01         | 0.07 |         | 0.01            | 0.08 |         |
| Electrodes: LP vs. HP and IN x Average vs. Idiosyncratic   | 0.05         | 0.21 |         | 0.08            | 0.29 |         |
| Electrodes: HP vs. IN x Average vs. Idiosyncratic          | 0.22         | 0.47 |         | 0.04            | 0.19 |         |
| Residual                                                   | 4.21         | 2.05 |         | 3.14            | 1.77 |         |

S2.2 Experiment 2: Mixed effects models of mean amplitude in N400 and Frontal Positivity windows.
