# Supplementary material
Source: PubMed Central journal article supplement (PMC7943179)
Supplement: NIHMS1672779-supplement-Supplemental_Material_S3.pdf [file NIHMS1672779-supplement-Supplemental_Material_S3.pdf]

### Supplemental Material S3

Bayesian single-trial level re-analyses of ERP data from Experiments 1 and 2. All models below were fit using the “brms” package (Bürkner, 2017), with weakly regularizing priors for all population-level effects (normal distribution with a mean of 0 and standard deviation of 10), using four chains sampling for 4000 iterations (2000 of warmup). Contrasts were set up in the same way as with the lme4 models but weighted by the number of trials in each cell (only correct trials without artifacts were included). For all models, the grouping variables were Participants, Electrodes nested within Participants, and Target words. Bold rows indicate parameters for which there is evidence of an effect because the 90% Highest Density Interval (chosen because it is more stable than 95% given the effective sample sizes in our models; Kruschke, 2015) doesn’t contain 0 or over 90% (less than 10% for negative effects) of the posterior distribution exceeds 0.

Table S3.1. Posterior estimates for multi-level model of mean amplitude in the N400 window for visual stimuli in Experiment 1.

| Population-level effects             | Estimate       | Std. Error  | HDI lower   | HDI upper   | Posterior Prop. > 0 |
|--------------------------------------|----------------|-------------|-------------|-------------|---------------------|
| <b>Intercept</b>                     | <b>2.84</b>    | <b>1.36</b> | <b>0.70</b> | <b>5.10</b> | <b>0.98</b>         |
| <b>IN vs. LP &amp; HP</b>            | <b>3.9</b>     | <b>0.87</b> | <b>2.52</b> | <b>5.34</b> | <b>1.00</b>         |
| LP vs. HP                            | -0.23          | 0.83        | -1.51       | 1.18        | 0.40                |
| Group-level effects                  | Std. Deviation | Std. Error  |             |             |                     |
| Participant:Intercept                | 5.1            | 1.07        |             |             |                     |
| Participant:IN vs. LP & HP           | 2.41           | 0.57        |             |             |                     |
| Participant:LP vs. HP                | 2.13           | 0.54        |             |             |                     |
| Participant:Electrode:Intercept      | 1.53           | 0.15        |             |             |                     |
| Participant:Electrode:IN vs. LP & HP | 0.19           | 0.15        |             |             |                     |
| Participant:Electrode:LP vs. HP      | 0.25           | 0.18        |             |             |                     |
| Target:Intercept                     | 4.02           | 0.22        |             |             |                     |

Table S3.2. Posterior estimates for multi-level model of mean amplitude in the N400 window for auditory stimuli in Experiment 1.

| Population-level effects             | Estimate       | Std. Error  | HDI lower    | HDI upper    | Posterior Prop. > 0 |
|--------------------------------------|----------------|-------------|--------------|--------------|---------------------|
| <b>Intercept</b>                     | <b>-2.95</b>   | <b>0.95</b> | <b>-4.51</b> | <b>-1.36</b> | <b>0.0014</b>       |
| <b>IN vs. LP &amp; HP</b>            | <b>3.99</b>    | <b>0.79</b> | <b>2.75</b>  | <b>5.34</b>  | <b>1.00</b>         |
| <b>LP vs. HP</b>                     | <b>2.12</b>    | <b>0.86</b> | <b>0.75</b>  | <b>3.57</b>  | <b>0.99</b>         |
| Group-level effects                  | Std. Deviation | Std. Error  |              |              |                     |
| Participant:Intercept                | 3.57           | 0.70        |              |              |                     |
| Participant:IN vs. LP & HP           | 2.27           | 0.56        |              |              |                     |
| Participant:LP vs. HP                | 2.62           | 0.56        |              |              |                     |
| Participant:Electrode:Intercept      | 0.39           | 0.17        |              |              |                     |
| Participant:Electrode:IN vs. LP & HP | 0.17           | 0.13        |              |              |                     |
| Participant:Electrode:LP vs. HP      | 0.2            | 0.15        |              |              |                     |
| Target:Intercept                     | 3.35           | 0.19        |              |              |                     |

Table S3.3. Posterior estimates for multi-level model of mean amplitude in the Frontal Positivity window for visual stimuli in Experiment 1.

| Population-level effects        | Estimate       | Std. Error  | HDI lower    | HDI upper    | Posterior Prop. > 0 |
|---------------------------------|----------------|-------------|--------------|--------------|---------------------|
| <b>Intercept</b>                | <b>-1.99</b>   | <b>1.17</b> | <b>-3.93</b> | <b>-0.13</b> | <b>0.043</b>        |
| <b>LP vs. HP &amp; IN</b>       | <b>-1.00</b>   | <b>0.75</b> | <b>-2.24</b> | <b>0.22</b>  | <b>0.088</b>        |
| <b>HP vs. IN</b>                | <b>1.42</b>    | <b>1.02</b> | <b>-0.26</b> | <b>3.07</b>  | <b>0.919</b>        |
| Group-level effects             | Std. Deviation | Std. Error  |              |              |                     |
| Participant:Intercept           | 4.32           | 0.96        |              |              |                     |
| Participant:LP vs. HP & IN      | 1.95           | 0.48        |              |              |                     |
| Participant:HP vs. IN           | 2.96           | 0.69        |              |              |                     |
| Participant:Electrode:Intercept | 3.02           | 0.19        |              |              |                     |

|                                      |      |      |  |  |  |
|--------------------------------------|------|------|--|--|--|
| Participant:Electrode:LP vs. HP & IN | 0.24 | 0.18 |  |  |  |
| Participant:Electrode:HP vs. IN      | 0.24 | 0.18 |  |  |  |
| Target:Intercept                     | 4.11 | 0.23 |  |  |  |

Table S3.4. Posterior estimates for multi-level model of mean amplitude in the Frontal Positivity window for auditory stimuli in Experiment 1.

| Population-level effects             | Estimate       | Std. Error  | HDI lower    | HDI upper    | Posterior Prop. > 0 |
|--------------------------------------|----------------|-------------|--------------|--------------|---------------------|
| <b>Intercept</b>                     | <b>-5.53</b>   | <b>1.15</b> | <b>-7.37</b> | <b>-3.63</b> | <b>0</b>            |
| <b>LP vs. HP &amp; IN</b>            | <b>-1.53</b>   | <b>0.85</b> | <b>-2.95</b> | <b>-0.17</b> | <b>0.036</b>        |
| <b>HP vs. IN</b>                     | <b>3.26</b>    | <b>1.03</b> | <b>1.57</b>  | <b>4.92</b>  | <b>0.999</b>        |
| Group-level effects                  | Std. Deviation | Std. Error  |              |              |                     |
| Participant:Intercept                | 4.32           | 0.94        |              |              |                     |
| Participant:LP vs. HP & IN           | 2.63           | 0.57        |              |              |                     |
| Participant:HP vs. IN                | 3.05           | 0.66        |              |              |                     |
| Participant:Electrode:Intercept      | 3.03           | 0.19        |              |              |                     |
| Participant:Electrode:LP vs. HP & IN | 0.22           | 0.16        |              |              |                     |
| Participant:Electrode:HP vs. IN      | 0.66           | 0.27        |              |              |                     |
| Target:Intercept                     | 3.67           | 0.2         |              |              |                     |

Table S3.5. Posterior estimates for multi-level model of mean amplitude in the pre-Frontal Positivity window for visual stimuli in Experiment 1.

| Population-level effects  | Estimate     | Std. Error  | HDI lower    | HDI upper   | Posterior Prop. > 0 |
|---------------------------|--------------|-------------|--------------|-------------|---------------------|
| <b>Intercept</b>          | <b>-4.32</b> | <b>1.14</b> | <b>-6.14</b> | <b>-2.4</b> | <b>0.00013</b>      |
| <b>LP vs. HP &amp; IN</b> | <b>-1.17</b> | <b>0.83</b> | <b>-2.6</b>  | <b>0.11</b> | <b>0.07537</b>      |
| HP vs. IN                 | 1.1          | 1.1         | -0.73        | 2.88        | 0.84425             |

| Group-level effects                  | Std. Deviation | Std. Error |  |  |  |
|--------------------------------------|----------------|------------|--|--|--|
| Participant:Intercept                | 4.39           | 1.02       |  |  |  |
| Participant:LP vs. HP & IN           | 1.93           | 0.61       |  |  |  |
| Participant:HP vs. IN                | 2.99           | 0.82       |  |  |  |
| Participant:Electrode:Intercept      | 2.28           | 0.27       |  |  |  |
| Participant:Electrode:LP vs. HP & IN | 0.31           | 0.25       |  |  |  |
| Participant:Electrode:HP vs. IN      | 0.38           | 0.29       |  |  |  |
| Target:Intercept                     | 4.37           | 0.26       |  |  |  |

Table S3.6. Posterior estimates for multi-level model of mean amplitude in the pre-Frontal Positivity window for auditory stimuli in Experiment 1.

| Population-level effects             | Estimate       | Std. Error  | HDI lower    | HDI upper    | Posterior Prop. > 0 |
|--------------------------------------|----------------|-------------|--------------|--------------|---------------------|
| <b>Intercept</b>                     | <b>-5.48</b>   | <b>1.14</b> | <b>-7.33</b> | <b>-3.61</b> | <b>0</b>            |
| <b>LP vs. HP &amp; IN</b>            | <b>-1.46</b>   | <b>0.84</b> | <b>-2.86</b> | <b>-0.11</b> | <b>0.044</b>        |
| <b>HP vs. IN</b>                     | <b>3.27</b>    | <b>1</b>    | <b>1.64</b>  | <b>4.89</b>  | <b>0.999</b>        |
| Group-level effects                  | Std. Deviation | Std. Error  |              |              |                     |
| Participant:Intercept                | 4.34           | 0.95        |              |              |                     |
| Participant:LP vs. HP & IN           | 2.64           | 0.59        |              |              |                     |
| Participant:HP vs. IN                | 3.06           | 0.66        |              |              |                     |
| Participant:Electrode:Intercept      | 3.04           | 0.19        |              |              |                     |
| Participant:Electrode:LP vs. HP & IN | 0.22           | 0.16        |              |              |                     |
| Participant:Electrode:HP vs. IN      | 0.65           | 0.27        |              |              |                     |
| Target:Intercept                     | 3.67           | 0.21        |              |              |                     |

Table S3.7. Posterior estimates for multi-level model of mean amplitude in the N400 window in Experiment 2.

| Population-level effects                                         | Estimate       | Std. Error   | HDI lower   | HDI upper   | Posterior Prop. > 0 |
|------------------------------------------------------------------|----------------|--------------|-------------|-------------|---------------------|
| Intercept                                                        | 0.21           | 0.536        | -0.66       | 1.09        | 0.66                |
| <b>IN vs. LP &amp; HP</b>                                        | <b>5.01</b>    | <b>0.751</b> | <b>3.72</b> | <b>6.19</b> | <b>1</b>            |
| <b>HP vs. LP</b>                                                 | <b>1.56</b>    | <b>0.724</b> | <b>0.4</b>  | <b>2.78</b> | <b>0.98</b>         |
| Average vs. Idiosyncratic                                        | -0.32          | 0.563        | -1.2        | 0.62        | 0.29                |
| IN vs. HP & LP x Average vs. Idiosyncratic                       | -1.37          | 1.169        | -3.41       | 0.44        | 0.12                |
| HP vs. LP x Average vs. Idiosyncratic                            | 0.45           | 1.501        | -2.07       | 2.83        | 0.62                |
| Group-level effects                                              | Std. Deviation | Std. Error   |             |             |                     |
| Participant:Intercept                                            | 2.34           | 0.411        |             |             |                     |
| Participant:IN vs. LP & HP                                       | 2.75           | 0.544        |             |             |                     |
| Participant:LP vs. HP                                            | 2.75           | 0.502        |             |             |                     |
| Participant:Average vs. Idiosyncratic                            | 2.07           | 0.391        |             |             |                     |
| Participant:IN vs. HP & LP x Average vs. Idiosyncratic           | 3.75           | 0.765        |             |             |                     |
| Participant:HP vs. LP x Average vs. Idiosyncratic                | 6.11           | 1.107        |             |             |                     |
| Participant:Electrode:Intercept                                  | 0.71           | 0.08         |             |             |                     |
| Participant:Electrode:IN vs. LP & HP                             | 0.15           | 0.117        |             |             |                     |
| Participant:Electrode:LP vs. HP                                  | 0.12           | 0.09         |             |             |                     |
| Participant:Electrode:Average vs. Idiosyncratic                  | 0.1            | 0.077        |             |             |                     |
| Participant:Electrode:IN vs. HP & LP x Average vs. Idiosyncratic | 0.25           | 0.185        |             |             |                     |
| Participant:Electrode:HP vs. LP x Average vs. Idiosyncratic      | 0.23           | 0.171        |             |             |                     |
| Target:Intercept                                                 | 4.9            | 0.162        |             |             |                     |

|                                  |      |       |  |  |  |
|----------------------------------|------|-------|--|--|--|
| Target:Average vs. Idiosyncratic | 8.46 | 0.292 |  |  |  |
|----------------------------------|------|-------|--|--|--|

Table S3.8. Posterior estimates for multi-level model of mean amplitude in the Frontal Positivity window in Experiment 2.

| Population-level effects                               | Estimate       | Std. Error  | HDI lower      | HDI upper     | Posterior Prop. > 0 |
|--------------------------------------------------------|----------------|-------------|----------------|---------------|---------------------|
| <b>Intercept</b>                                       | <b>-0.95</b>   | <b>0.55</b> | <b>-1.8403</b> | <b>-0.061</b> | <b>0.0393</b>       |
| <b>LP vs. IN &amp; HP</b>                              | <b>-1.99</b>   | <b>0.73</b> | <b>-3.1988</b> | <b>-0.82</b>  | <b>0.0043</b>       |
| <b>HP vs. IN</b>                                       | <b>-2.4</b>    | <b>0.88</b> | <b>-3.8218</b> | <b>-0.947</b> | <b>0.0051</b>       |
| Average vs. Idiosyncratic                              | -0.13          | 0.59        | -1.1147        | 0.827         | 0.4203              |
| LP vs. IN & HP x Average vs. Idiosyncratic             | 0.13           | 1.31        | -2.0718        | 2.203         | 0.5379              |
| <b>HP vs. IN x Average vs. Idiosyncratic</b>           | <b>2.28</b>    | <b>1.38</b> | <b>0.0078</b>  | <b>4.51</b>   | <b>0.9499</b>       |
| Group-level effects                                    | Std. Deviation | Std. Error  |                |               |                     |
| Participant:Intercept                                  | 2.29           | 0.46        |                |               |                     |
| Participant:LP vs. IN & HP                             | 3.01           | 0.52        |                |               |                     |
| Participant:HP vs. IN                                  | 3.46           | 0.61        |                |               |                     |
| Participant:Average vs. Idiosyncratic                  | 2.29           | 0.44        |                |               |                     |
| Participant:LP vs. IN & HP x Average vs. Idiosyncratic | 5.2            | 1.03        |                |               |                     |
| Participant:HP vs. IN x Average vs. Idiosyncratic      | 4.95           | 1.03        |                |               |                     |
| Participant:Electrode:Intercept                        | 3              | 0.15        |                |               |                     |
| Participant:Electrode:LP vs. IN & HP                   | 0.31           | 0.14        |                |               |                     |
| Participant:Electrode:HP vs. IN                        | 0.19           | 0.15        |                |               |                     |
| Participant:Electrode:Average vs. Idiosyncratic        | 0.14           | 0.1         |                |               |                     |
| Participant:Electrode:LP vs. IN & HP x Average vs.     | 0.21           | 0.15        |                |               |                     |

|                                                             |      |      |  |  |  |
|-------------------------------------------------------------|------|------|--|--|--|
| Idiosyncratic                                               |      |      |  |  |  |
| Participant:Electrode:HP vs. IN x Average vs. Idiosyncratic | 0.3  | 0.22 |  |  |  |
| Target:Intercept                                            | 4.6  | 0.16 |  |  |  |
| Target:Average vs. Idiosyncratic                            | 8.46 | 0.29 |  |  |  |

Table S3.9. Posterior estimates for multi-level model of mean amplitude in the pre-Frontal Positivity window in Experiment 2.

| Population-level effects                               | Estimate       | Std. Error  | HDI lower    | HDI upper    | Posterior Prop. > 0 |
|--------------------------------------------------------|----------------|-------------|--------------|--------------|---------------------|
| <b>Intercept</b>                                       | <b>-2.979</b>  | <b>0.55</b> | <b>-3.87</b> | <b>-2.06</b> | <b>0</b>            |
| <b>LP vs. IN &amp; HP</b>                              | <b>-1.721</b>  | <b>0.74</b> | <b>-2.94</b> | <b>-0.52</b> | <b>0.0118</b>       |
| <b>HP vs. IN</b>                                       | <b>-2.212</b>  | <b>0.92</b> | <b>-3.69</b> | <b>-0.68</b> | <b>0.0095</b>       |
| Average vs. Idiosyncratic                              | -0.133         | 0.59        | -1.11        | 0.85         | 0.4108              |
| LP vs. IN & HP x Average vs. Idiosyncratic             | -0.054         | 1.19        | -2.02        | 1.86         | 0.4861              |
| <b>HP vs. IN x Average vs. Idiosyncratic</b>           | <b>2.139</b>   | <b>1.37</b> | <b>-0.12</b> | <b>4.4</b>   | <b>0.9404</b>       |
| Group-level effects                                    | Std. Deviation | Std. Error  |              |              |                     |
| Participant:Intercept                                  | 2.173          | 0.51        |              |              |                     |
| Participant:LP vs. IN & HP                             | 2.918          | 0.51        |              |              |                     |
| Participant:HP vs. IN                                  | 3.597          | 0.65        |              |              |                     |
| Participant:Average vs. Idiosyncratic                  | 2.16           | 0.44        |              |              |                     |
| Participant:LP vs. IN & HP x Average vs. Idiosyncratic | 4.192          | 0.88        |              |              |                     |
| Participant:HP vs. IN x Average vs. Idiosyncratic      | 4.419          | 1.06        |              |              |                     |
| Participant:Electrode:Intercept                        | 2.766          | 0.23        |              |              |                     |
| Participant:Electrode:LP vs. IN & HP                   | 0.253          | 0.18        |              |              |                     |

|                                                                  |       |      |  |  |  |
|------------------------------------------------------------------|-------|------|--|--|--|
| Participant:Electrode:HP vs. IN                                  | 0.218 | 0.17 |  |  |  |
| Participant:Electrode:Average vs. Idiosyncratic                  | 0.181 | 0.14 |  |  |  |
| Participant:Electrode:LP vs. IN & HP x Average vs. Idiosyncratic | 0.322 | 0.24 |  |  |  |
| Participant:Electrode:HP vs. IN x Average vs. Idiosyncratic      | 0.421 | 0.32 |  |  |  |
| Target:Intercept                                                 | 4.691 | 0.17 |  |  |  |
| Target:Average vs. Idiosyncratic                                 | 8.785 | 0.32 |  |  |  |
